# Supplementary material for: LIGHT/LTβR signaling regulates self-renewal and differentiation of hematopoietic and leukemia stem cells
Source: PubMed Central journal article supplement (PMC7887212; doi:10.1038/s41467-021-21317-x), 2021-02-16
Supplement: 41467_2021_21317_MOESM1_ESM.pdf [file 41467_2021_21317_MOESM1_ESM.pdf]

**LIGHT/LT $\beta$ R signaling regulates self-renewal and differentiation of hematopoietic and leukemia stem cells**

Höpner, S.S et al.

- Supplementary material and methods
- Supplementary Figures 1-8
- Supplementary Tables 1-4

## Supplementary information

### Supplementary material and methods

#### Gene ontology (GO)

For GO enrichment, the list of differently expressed genes was grouped into functional hierarchies. Enrichment scores were calculated using a chi-square test comparing the proportion of the gene list in a group to the proportion of the background genes. A value  $\geq 3$  corresponded to a significant over-expression ( $p < 0.05$ ).

#### Gene expression profiling using Fluidigm system

Gene expression profiling was performed with FACS-purified LSKs from chimeric mice 6 weeks after transplantation using a Fluidigm<sup>®</sup>96.96 Dynamic Array<sup>™</sup> on the BioMark system (Fluidigm, San Francisco, United States) according to the manufacturer's protocol. Assays were designed based on EvaGreen<sup>®</sup> chemistry and primers for targeting desired pathways were designed accordingly for amplicons of 100-160bp using Primer3Plus (Supplementary Table 4).<sup>1</sup> Briefly, total RNA was isolated from FACS-purified LSKs 6 weeks post-transplantation using RNeasy<sup>®</sup> Micro Kit (QIAGEN AG, Basel, Switzerland). The quantity of extracted RNA was assessed using a NanoDrop ND-1000 spectrophotometer (Biolab, Mulgrave, VIC, Australia). For each sample, the extracted RNA was used to synthesize cDNA using the High Capacity cDNA Reverse Transcription Kit (AB<sup>™</sup>, CA, United States). cDNA was pre-amplified with a mix of primers specific to the target genes as the specific target amplification (STA) for 15 cycles. STA products were then diluted fivefold and analyzed with TaqMan<sup>™</sup> Gene Expression Master Mix and EvaGreen DNA binding dye in a 96:96 Fluidigm dynamic array. Ct values were calculated and visualized using BioMark real-time PCR analysis software (Fluidigm, San Francisco, United States). Each assay was performed in replicate.

Genes with Ct values of higher than 35.0 or differences of  $\geq 1.0$  in-between sample replicates were eliminated from the analysis. If the reference genes (*Actb* and *Gapdh*) were not expressed or differences of  $\geq 1.0$  in-between sample replicates were observed, the sample was not included in the analysis. Raw values were normalized using the geometric mean of two reference genes (*Actb* and *Gapdh*). The fold difference for each sample was calculated using the comparative Ct method.<sup>2</sup> Relative gene expression quantities after log<sub>2</sub> transformation were used for data analysis. Data were clustered using standard Euclidean's method based on the average linkage.

### **Cell signaling and *in silico* pathway analysis**

Gene networks representing differentially expressed genes were identified using the Ariadne Genomics Pathway Studio<sup>®</sup> database (Elsevier, Berlin, Germany).

Supplementary Figures  
Supplementary Figure 1

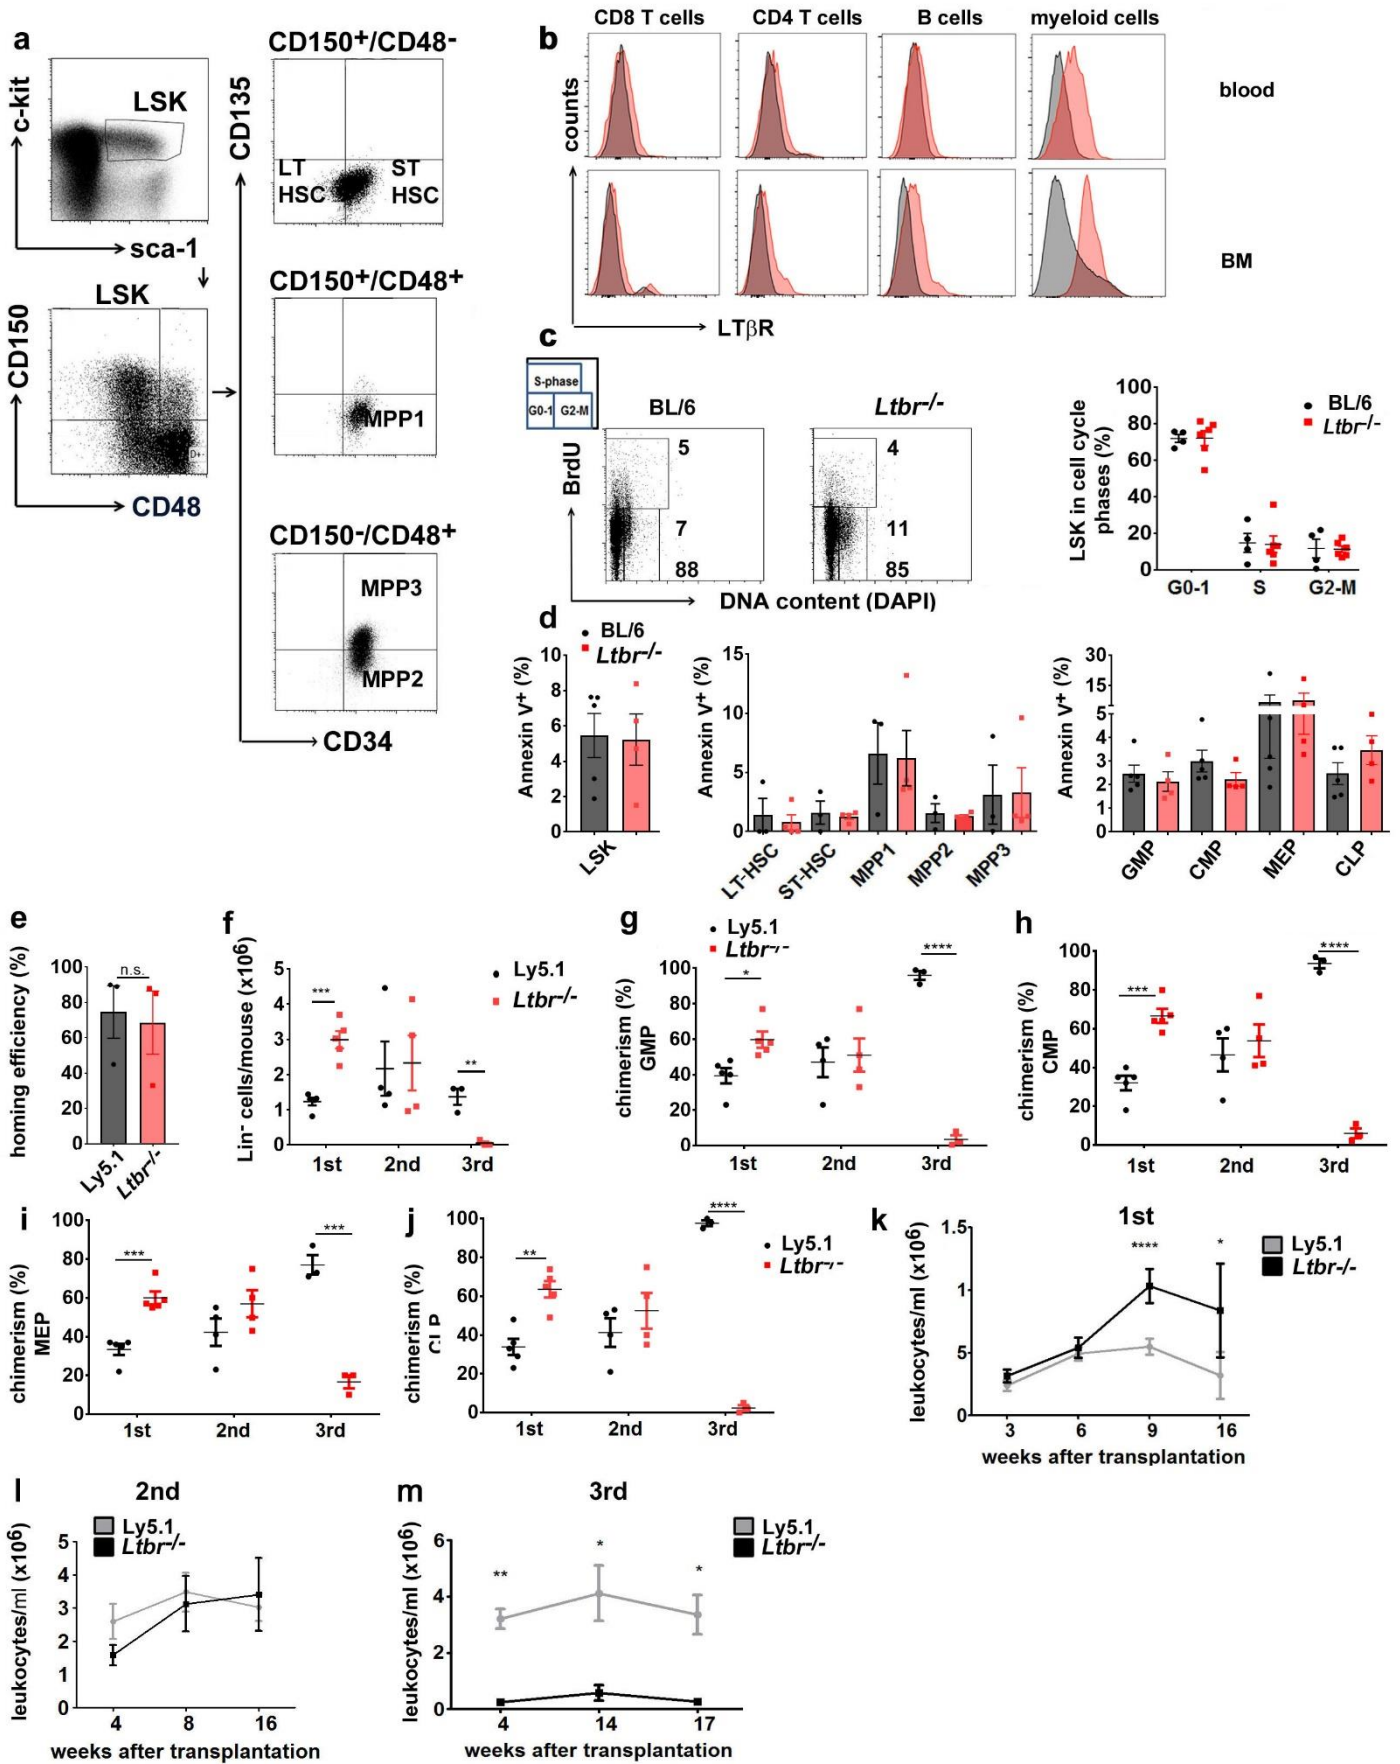

**Supplementary Figure 1: LT $\beta$ R is dispensable in steady state hematopoiesis but is crucial for reconstitution after hematopoietic stress. (a)** Gating strategy of LSK subsets (LT-HSC, ST-HSC, MPP1, MPP2, MPP3). **(b)** Representative histogram of LT $\beta$ R expression on indicated differentiated cells in blood and BM of naïve BL/6 mice. (grey: isotype control, red: LT $\beta$ R staining). **(c)** Cell cycle analysis of naïve BL/6 (n=4) and *Ltbr*<sup>-/-</sup> LSKs (n=7). Representative FACS dot plots and the percentage of cells in G0-1, S and G2-M phase are shown. **(d)** Percentages of Annexin-V<sup>+</sup> LSKs, LSK subsets (BL/6 n=3, *Ltbr*<sup>-/-</sup> n=4) and progenitor subsets in the BM of naïve BL/6 and *Ltbr*<sup>-/-</sup> mice (BL/6 n=5, *Ltbr*<sup>-/-</sup> n=4). **(e)** Homing of Ly5.1 and *Ltbr*<sup>-/-</sup> LSKs to the BM (% of CD45.1 and CD45.2 LSKs in the BM of Ly5.1/Ly5.2 mice relative to the numbers of total injected LSKs, (n=3). **(f)** Cell numbers of Ly5.1 and *Ltbr*<sup>-/-</sup> BM Lin<sup>-</sup> cells in 1<sup>st</sup>, 2<sup>nd</sup> and 3<sup>rd</sup> transplantation, n=5 (1<sup>st</sup>), n=4 (2<sup>nd</sup>), n=3 (3<sup>rd</sup>) mice. **(g-j)** Percentage of Ly5.1 and *Ltbr*<sup>-/-</sup> GMPs (g), CMPs (h), MEPs (i) and CLPs (j) in 1<sup>st</sup>, 2<sup>nd</sup> and 3<sup>rd</sup> transplantation. Data are shown as mean $\pm$ SEM of n=5 (1<sup>st</sup>), n=4 (2<sup>nd</sup>), n=3 (3<sup>rd</sup>) mice. **(k-m)** Numbers of Ly5.1 and *Ltbr*<sup>-/-</sup> leukocytes in Ly5.1/Ly5.2 recipients at indicated time points after 1<sup>st</sup> (k), 2<sup>nd</sup> (l) and 3<sup>rd</sup> (m) transplantation, n=5 (1<sup>st</sup>), n=4 (2<sup>nd</sup>), n=3 (3<sup>rd</sup>) mice. Data are depicted as mean $\pm$ SEM. Statistics: \*  $P < 0.05$ , \*\*  $P < 0.01$ , \*\*\*  $P < 0.001$  (two-tailed *t*-test). 1f: 1<sup>st</sup>  $p = 0.0002$ , 3<sup>rd</sup>  $p = 0.0048$ ; 1g: 1<sup>st</sup>  $p = 0.012$ , 3<sup>rd</sup>  $p < 0.0001$ ; 1h: 1<sup>st</sup>  $p = 0.0002$ , 3<sup>rd</sup>  $p < 0.0001$ ; 1i: 1<sup>st</sup>  $p = 0.0003$ , 3<sup>rd</sup>  $p = 0.0006$ ; 1j: 1<sup>st</sup>  $p = 0.001$ , 3<sup>rd</sup>  $p < 0.0001$ ; 1k wk9  $p < 0.0001$ , wk16  $p = 0.032$ ; 1m: wk4  $p = 0.0012$ , wk14  $p = 0.026$ , wk17  $p = 0.012$ .

Supplementary Figure 2:

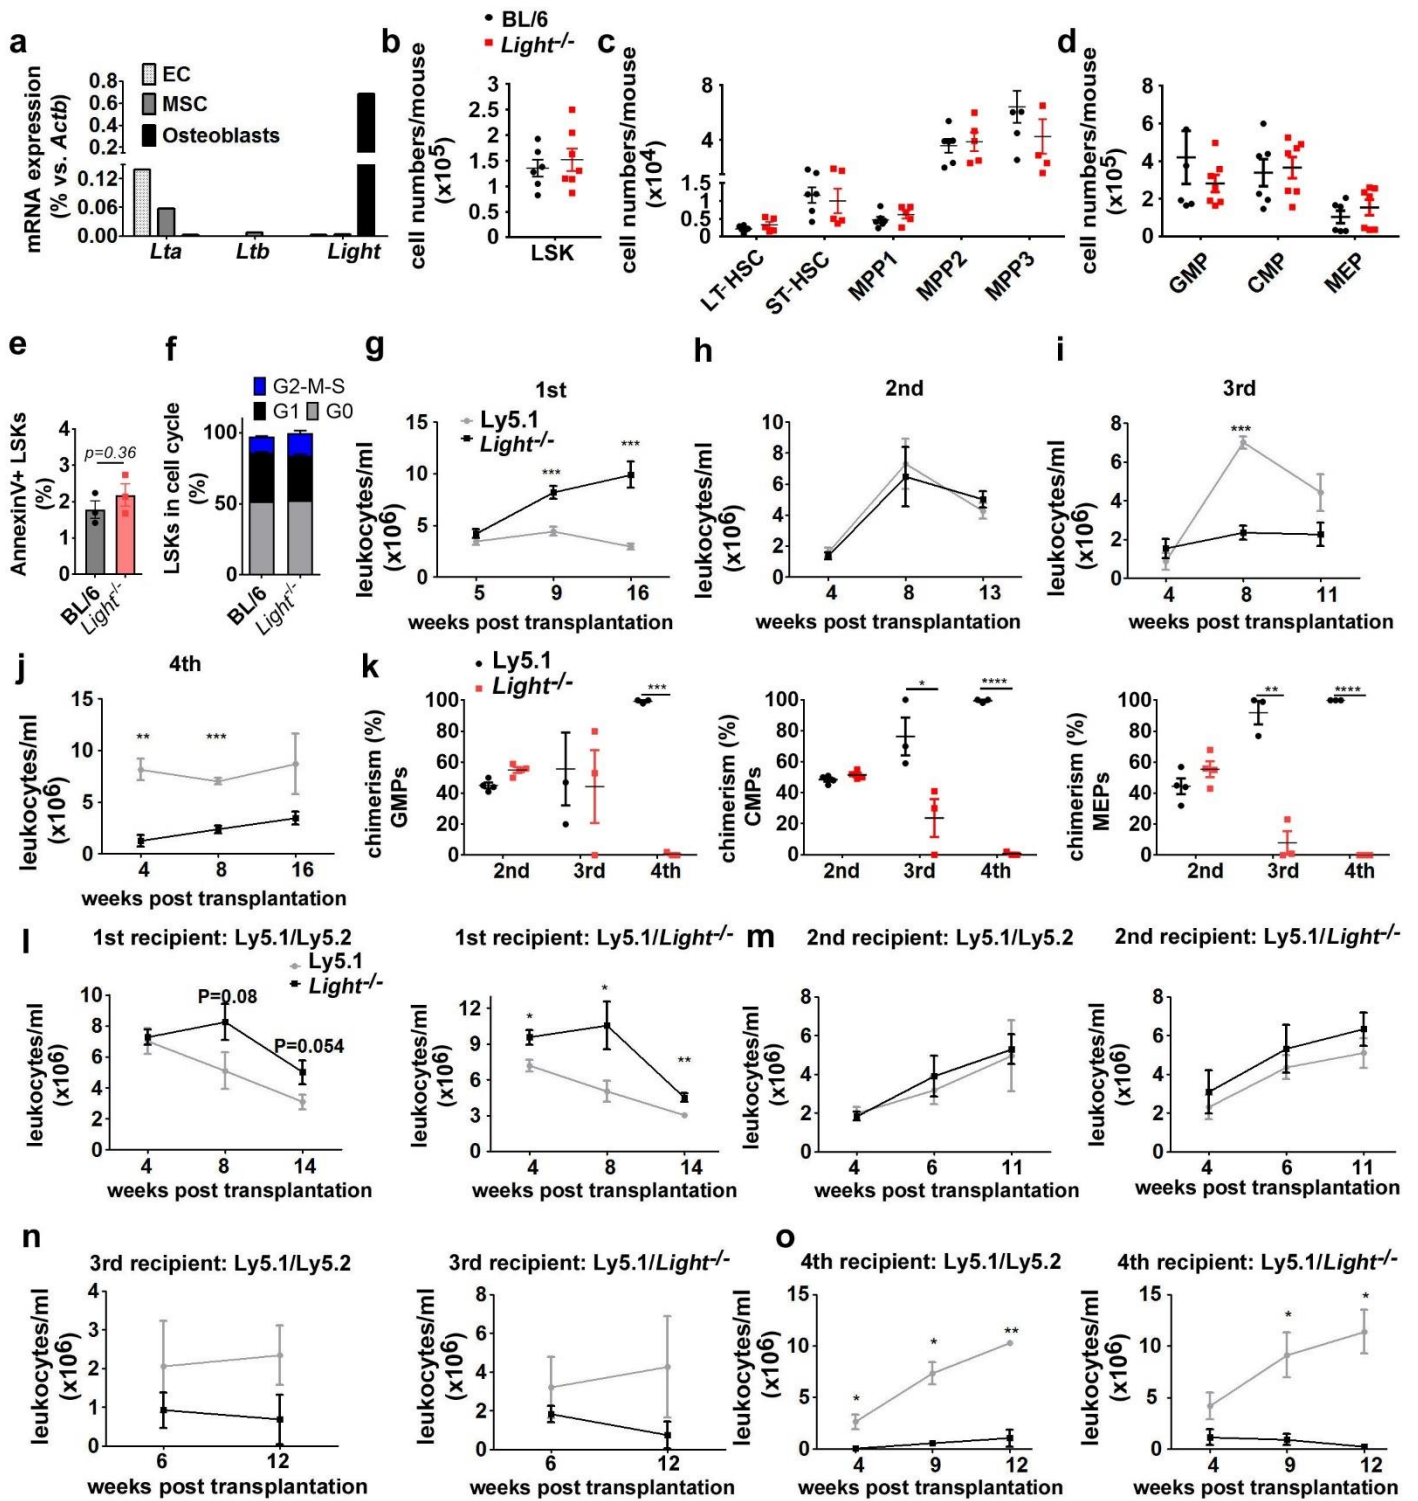

**Supplementary Figure 2: Cell-autonomous LIGHT expression prevents exhaustion of HSCs.**

**(a)** Relative expression of *Light*, *Lta* and *Ltb* of FACS-purified EC; MSC and Osteoblasts from naïve BL/6 mice (cells were pooled from 10 mice). **(b-d)** Numbers of LSKs (b), LSK subsets (LT-HSC, ST-HSC, MPP1, MPP2, MPP3) (c) and myeloid progenitors (GMP, CMP, MEP) (d) in the BM of naïve BL/6 and *Light*<sup>-/-</sup> mice (BL/6 n=6, *Light*<sup>-/-</sup> n=7). **(e)** Percentages of Annexin-V<sup>+</sup> LSKs of BL/6 (n=3) and *Light*<sup>-/-</sup> (n=3) mice. Data are shown as mean±SEM. **(f)** Percentage of BL/6 (n=2) and *Light*<sup>-/-</sup> (n=3) LSKs in G0-1, S and G2-M phase. Data are shown as mean±SEM **(g-j)** Numbers of BL/6 and *Light*<sup>-/-</sup> leukocytes in blood from Ly5.1/Ly5.2 recipients at the time points indicated post transplantation, 1<sup>st</sup> (g), 2<sup>nd</sup>(h), 3<sup>rd</sup> (i), 4<sup>th</sup>(j). **(k)** Percentage of BL/6 and *Light*<sup>-/-</sup> myeloid progenitors (GMP, CMP, MEP) in the 2<sup>nd</sup>, 3<sup>rd</sup> and 4<sup>th</sup> transplantation. Data are shown as mean±SEM of n=4 (2<sup>nd</sup>), n=3 (3<sup>rd</sup>, 4<sup>th</sup>) mice. **(l-o)** Number of donor leukocytes in blood of Ly5.1/Ly5.2 and congenic Ly5.1/*Light*<sup>-/-</sup> recipients in 1<sup>st</sup> (l), 2<sup>nd</sup> (m), 3<sup>rd</sup> (n) and 4<sup>th</sup> (o) serial transplantation. Data are shown as mean±SEM, Ly5.1/Ly5.2 recipients: n=7 (1<sup>st</sup>), n=5 (2<sup>nd</sup>), n=3 (3<sup>rd</sup>); n=3 (4<sup>th</sup>) Ly5.1/*Light*<sup>-/-</sup> recipients: n=5 (1<sup>st</sup>), n=5 (2<sup>nd</sup>), n=3 (3<sup>rd</sup>), n=3 (4<sup>th</sup>). Statistics: \*  $P < 0.05$ , \*\*  $P < 0.01$ , \*\*\*  $P < 0.001$ , \*\*\*\*  $P < 0.0001$  (two-tailed *t*-test). 2g: 1<sup>st</sup> wk9 p=0.0003, wk16 p=0.0002; 2i: 3<sup>rd</sup> wk8 p=0.0006; 2j:4<sup>th</sup> wk4 p=0.004, wk8 p=0.0006; 2k: GMP p=0.0092, CMP 3<sup>rd</sup> p= 0.038, 4<sup>th</sup> p<0.0001; MEP 3<sup>rd</sup> p=0.0014, 4<sup>th</sup> p<0.0001; 2m: Ly5.1/*Light*<sup>-/-</sup> wk4 p=0.023, wk8 p=0.03, wk12 p=0.006; 2o:Ly5.1/Ly5.2 wk4 p=0.02, wk9 p=0.03, wk12 p=0.02, Ly5.1/*Light*<sup>-/-</sup> wk9 p=0.025, wk12 p=0.034.

Supplementary Figure 3:

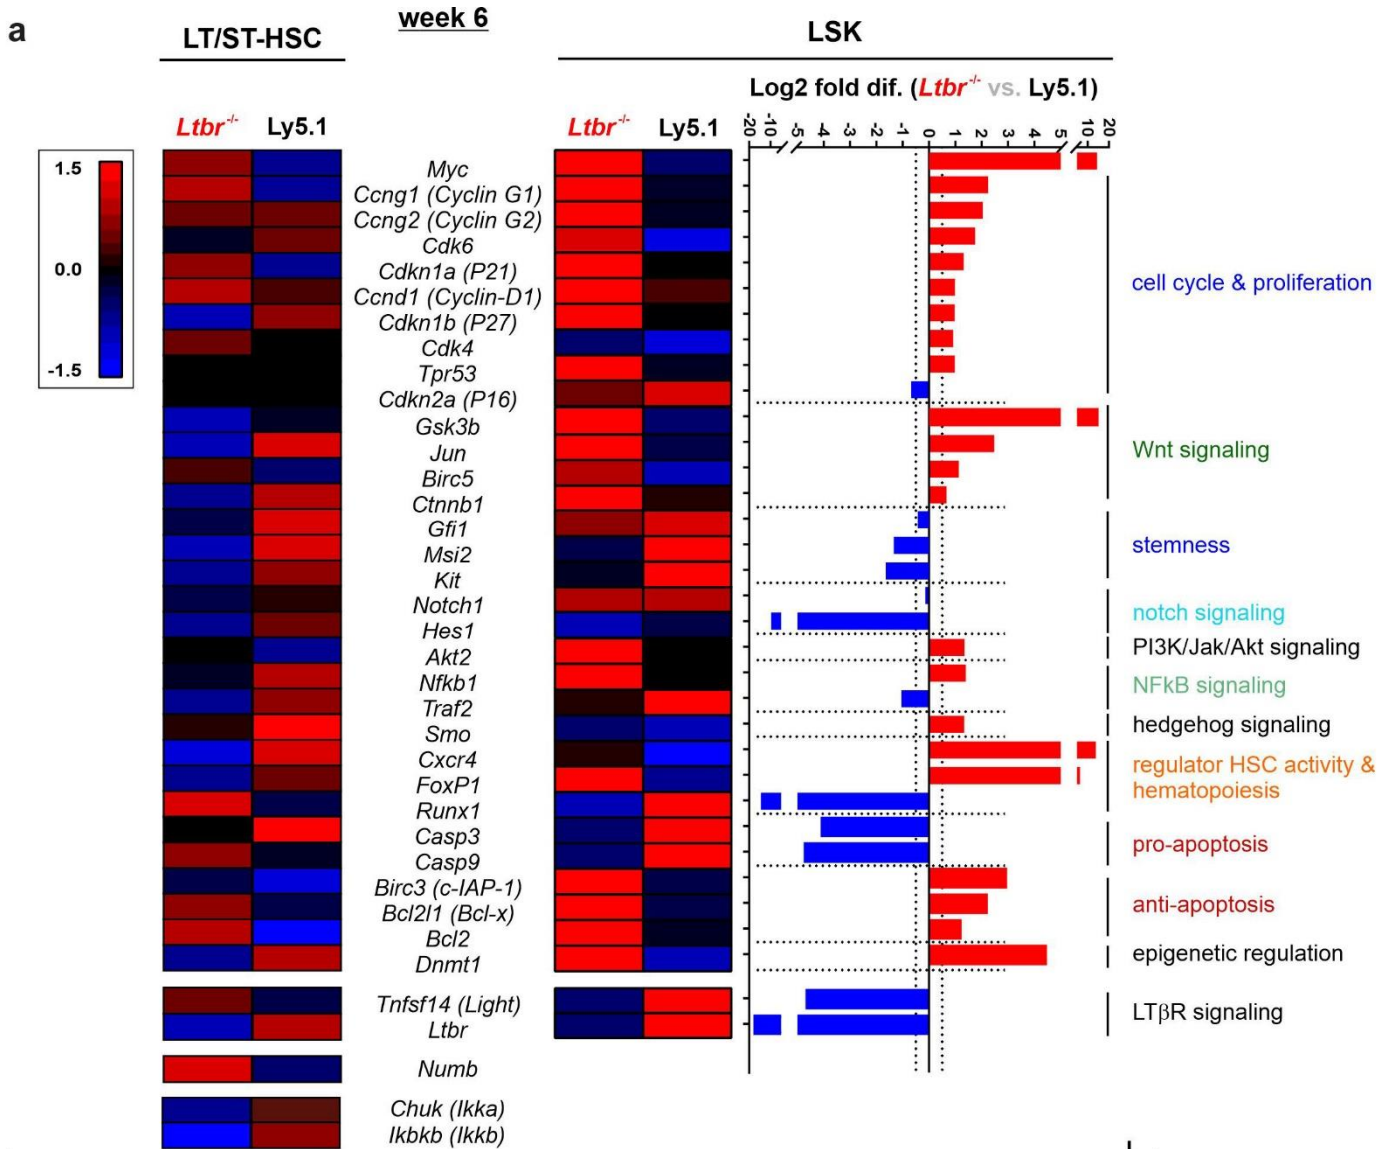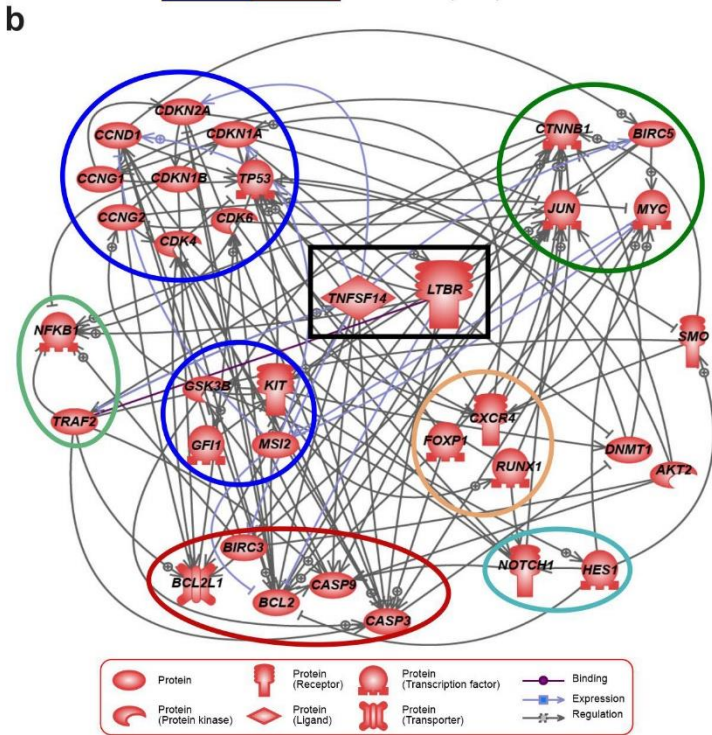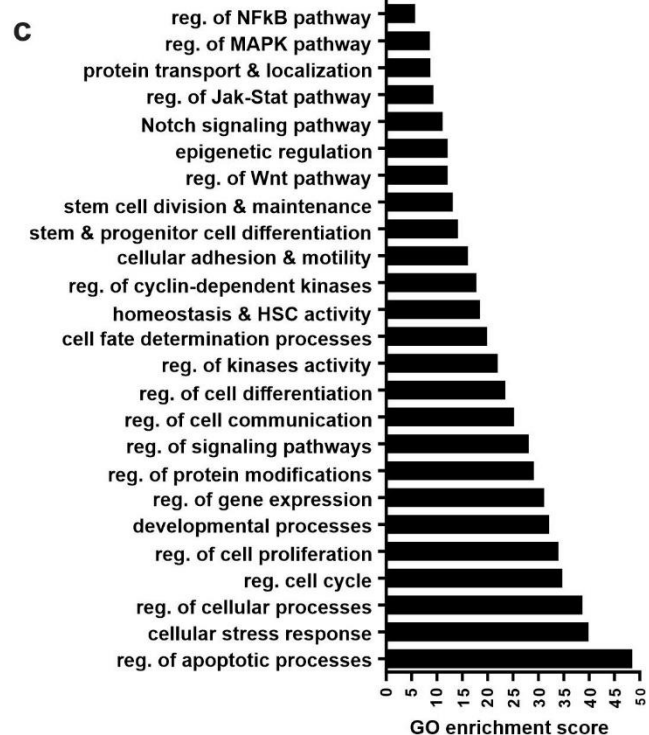



### Supplementary Figure 3: Gene expression analysis for LT-HSCs and LSKs from chimeric mice

**(a)** Heatmap of differentially expressed genes in FACS-purified *Ltbr*<sup>-/-</sup> LT/ST-HSCs (Lin<sup>-</sup>, c-kit<sup>+</sup>, sca-1<sup>+</sup>, CD150<sup>+</sup>, CD48<sup>-</sup>, left panel) and LSKs (right panel) compared to Ly5.1 LT/ST-HSCs and LSKs respectively from chimeras six weeks after primary transplantation (gene expression log<sub>2</sub> fold differences *Ltbr*<sup>-/-</sup> vs. Ly5.1; n=4). **(b)** *In silico* gene network and canonical pathway analysis of the differentially expressed genes in LSKs; colors of the circles are corresponding to pathways highlighted in part a. **(c)** Gene ontology (GO) enrichment analysis of the biological pathways regulated by LTβR expressed on LSKs.

## Supplementary Figure 4:

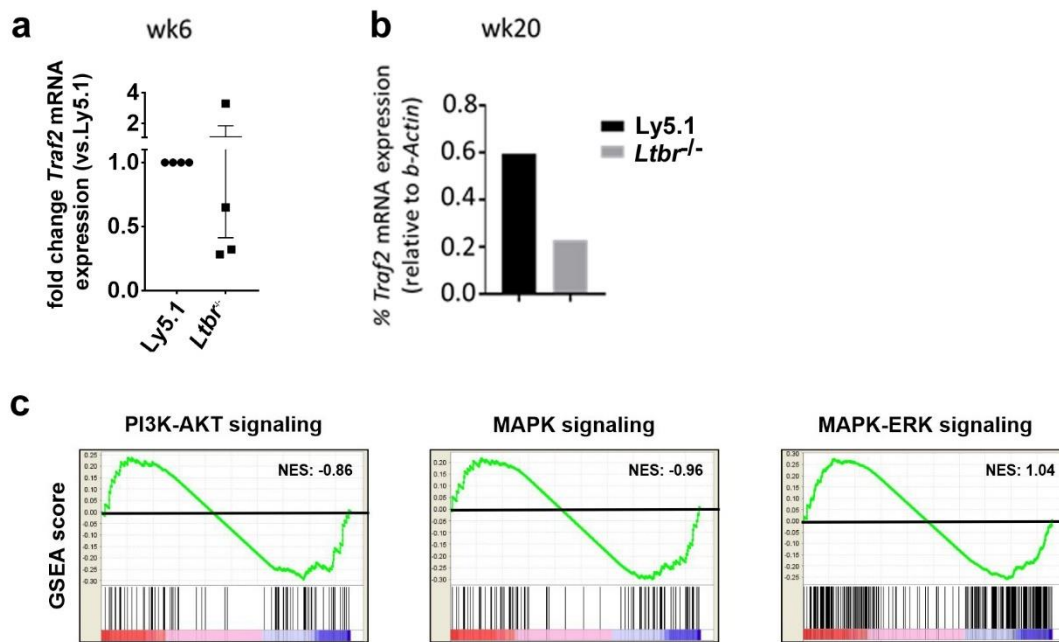

### Supplementary Figure 4: analysis of signaling pathways involved in LIGHT-mediated activation

**(a)** Fold change of *Traf2* mRNA expression of *Ltbr*<sup>-/-</sup> LSKs relative to the expression in Ly5.1 LSKs from chimeras 6 weeks post-transplantation, n=4. Data are shown as mean±SEM. **(b)** Relative *Traf2* mRNA expression of Ly5.1 and *Ltbr*<sup>-/-</sup> LSKs from chimeras 20 weeks post-transplantation, cells for analysis are pooled from n=4 mice. **(c)** Gene set enrichment analysis of *Ltbr*<sup>-/-</sup> LT/ST-HSCs from chimeric mice 6 weeks post-transplantation for signatures associated with PI3K-AKt, MAPK and MAPK-ERK signaling.

## Supplementary Figure 5:

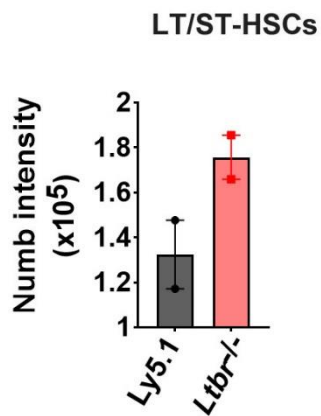

### Supplementary Figure 5: Analysis of Numb expression on LT/ST-HSCs

Numb intensity (MFI) of *Ltbr*<sup>-/-</sup> and Ly5.1 LT/ST-HSCs from chimeric mice 10-12 weeks post-transplantation (pooled data from n=9 mice in two independent experiments). Data are presented as mean±SEM.

Supplementary Figure 6:

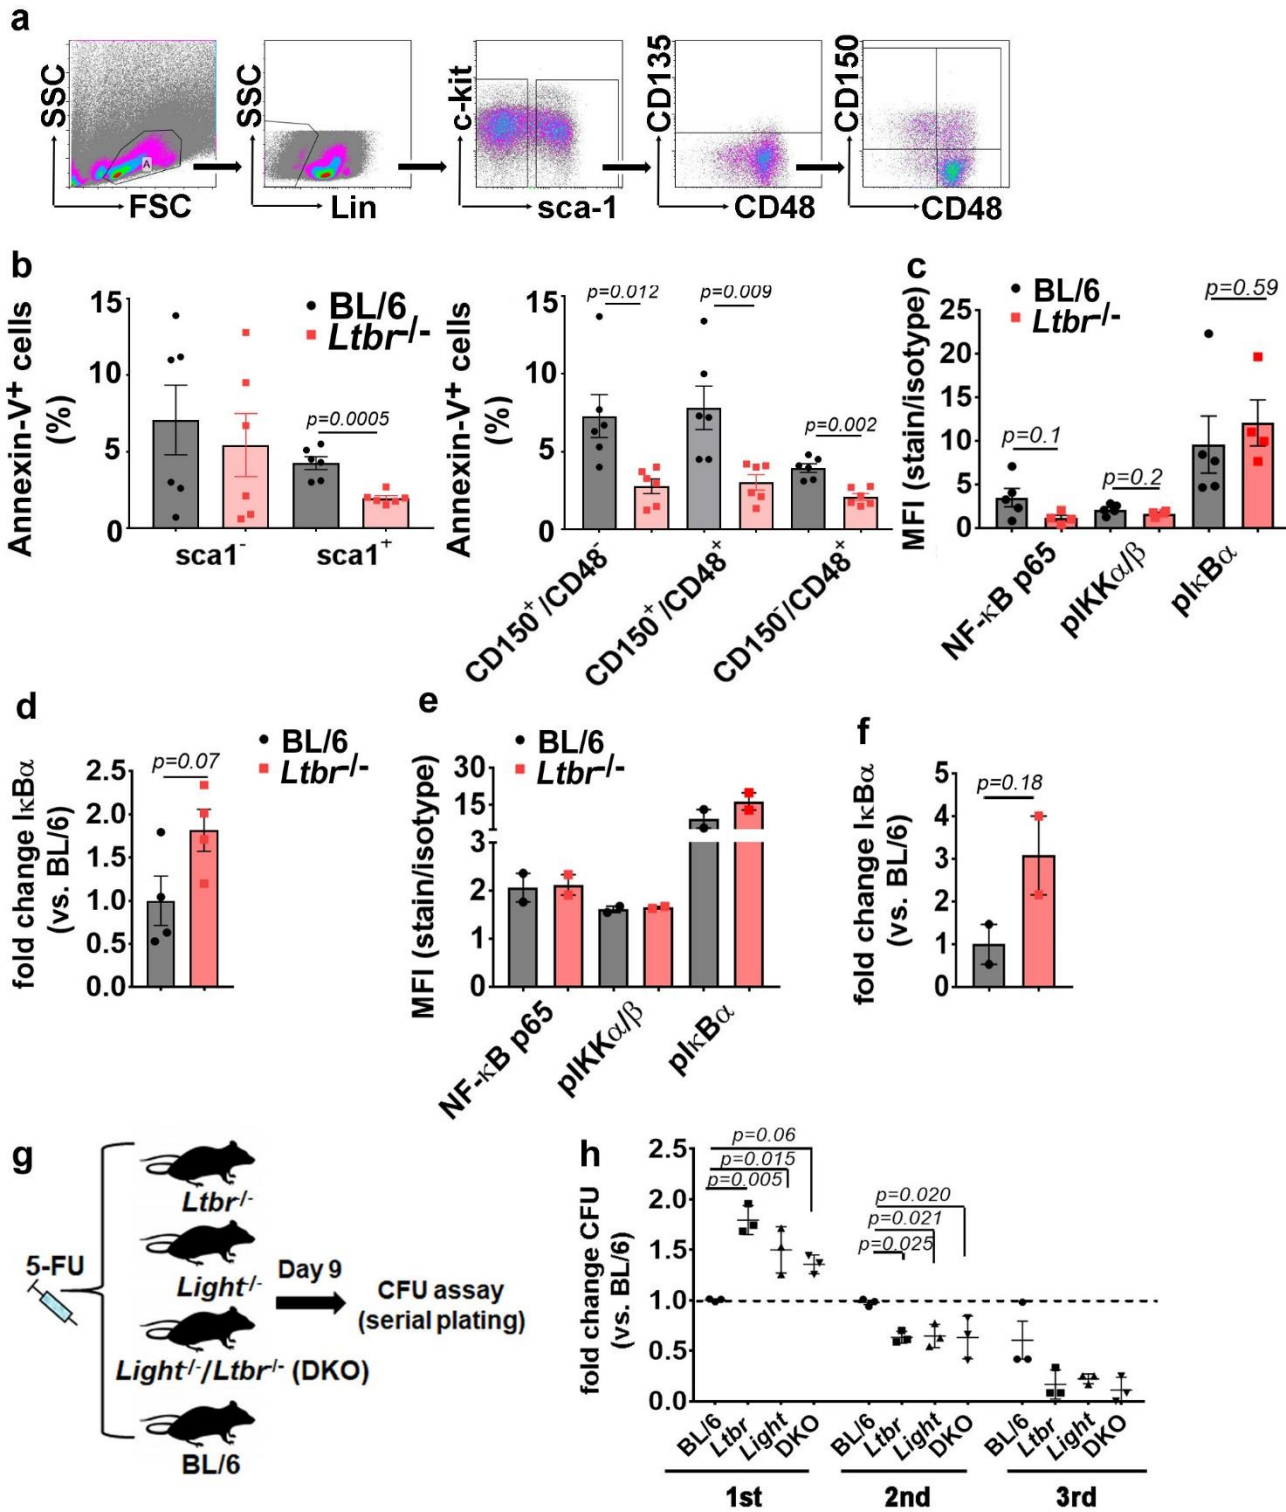

## Supplementary Figure 6: Analysis of cell death and colony formation of 5-FU treated mice

**(a)** Gating strategy of LSK subsets (LT-/ST-HSCs, MPP1, MPP2/3) from mice treated with 150mg/kg 5-FU, eight days post-infection, accordingly to the expression of c-kit and sca-1. **(b)** Percentage of apoptotic sca1<sup>-</sup> and sca1<sup>+</sup> cells within BL/6 and *Ltbr*<sup>-/-</sup> BM Lin<sup>-</sup> cells, eight days after 5-FU treatment and percentage of Annexin-V<sup>+</sup> in LSK subsets from BL/6 and *Ltbr*<sup>-/-</sup> mice. One out of two independent experiments is shown (n=6 mice, per group). **(c)** Protein expression (MFI) of NFκBp65, phosphorylated IKKα/β and IκBα of naïve BM LT/ST-HSCs from BL/6 n=5 and *Ltbr*<sup>-/-</sup> n=4 mice. Data are pooled for analysis from two independent experiments. **(d)** Fold change of total IκBα in *Ltbr*<sup>-/-</sup> BM LT/ST-HSCs relative to BL/6. Data are pooled for analysis from two independent experiments, BL/6 n=4 and *Ltbr*<sup>-/-</sup> n=4 mice. **(e)** Protein expression (MFI) of NFκBp65, phosphorylated IKKα/β and IκBα of BM LT/ST-HSCs (Lin<sup>-</sup>sca-1<sup>+</sup>CD48<sup>-</sup>CD150<sup>+</sup>) from BL/6 and *Ltbr*<sup>-/-</sup> mice eight days post-treatment with 5-FU, n=2 mice for each data point. One out of two independent experiments is shown. **(f)** Fold change of total IκBα in BM LT/ST-HSCs from 5-FU treated *Ltbr*<sup>-/-</sup> mice relative to BM LT/ST-HSCs from 5-FU treated BL/6 mice, n=2 mice for each data point. One out of two independent experiments is shown. Data are presented as mean±SEM. **(g)** Schematic of 5-FU treatment for *Light*<sup>-/-</sup>/*Ltbr*<sup>-/-</sup> double knockout (DKO), *Light*<sup>-/-</sup>, *Ltbr*<sup>-/-</sup> and BL/6 mice. **(h)** Fold change of CFU capacity of FACS-purified BL/6, *Ltbr*<sup>-/-</sup>, *Light*<sup>-/-</sup> and DKO LSKs in serial re-plating experiments, (n=3). Data are presented as mean±SEM. Statistics: two-tailed *t*-test.

Supplementary Figure7:

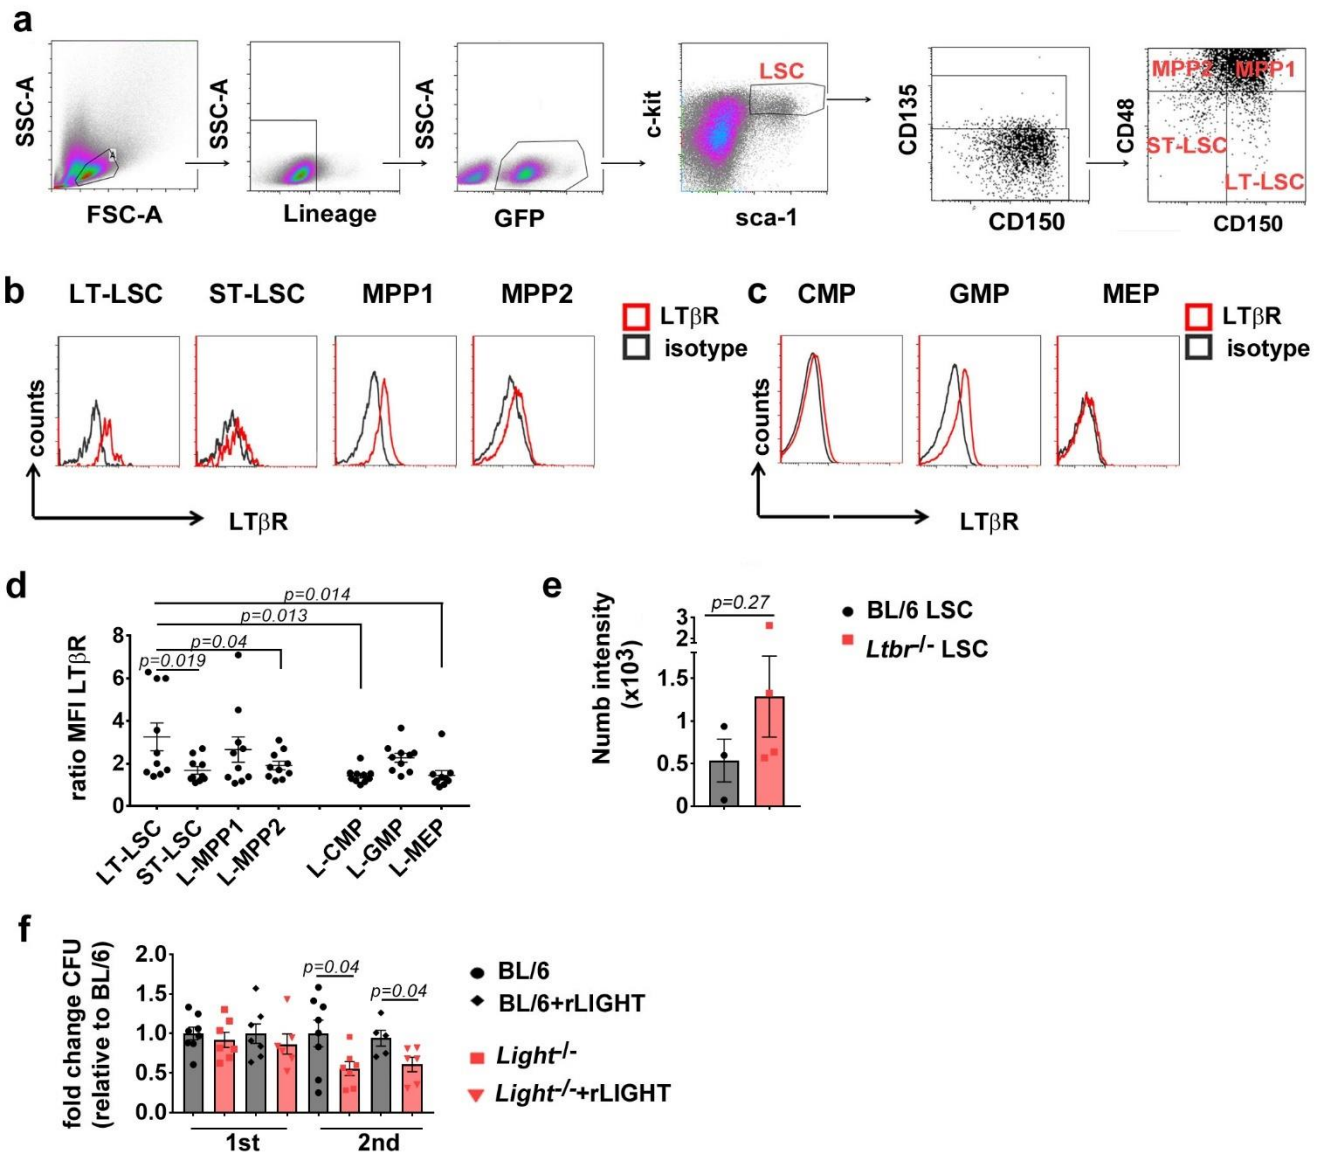

### Supplementary Figure 7: LT $\beta$ R signaling in CML bearing mice.

**(a)** Gating strategy of LSCs and LSC subsets in CML mice. **(b-c)** Representative histograms of LT $\beta$ R expression on LSC subsets (b) and BM myeloid progenitors (c) of BL/6 CML mice 19 days after CML induction. **(d)** Quantification of LT $\beta$ R expression in BL/6 LSCs, LSC subsets and myeloid progenitors from BL/6 mice (ratio MFI: MFI stain/ isotype, n=10). **(e)** Mean intensity (MFI) of BL/6 and *Ltbr*<sup>-/-</sup> LSCs from CML mice 19 days post-transplantation (pooled data from n=3 BL/6 CML and n=4 *Ltbr*<sup>-/-</sup> CML). **(f)** Fold change in CFU capacity of *Light*<sup>-/-</sup> LSCs relative to BL/6 LSCs in serial replating, in absence or presence of 10 ng/ml recombinant LIGHT protein (BL/6 n=8, *Light*<sup>-/-</sup> n=7, for supplementation of rLIGHT: BL/6 n=7, *Light*<sup>-/-</sup> n=6). Data are shown as pooled data from two independent experiments. Data are presented as mean $\pm$ SEM. Statistics: two-tailed *t*-test.

Supplementary Figure 8:

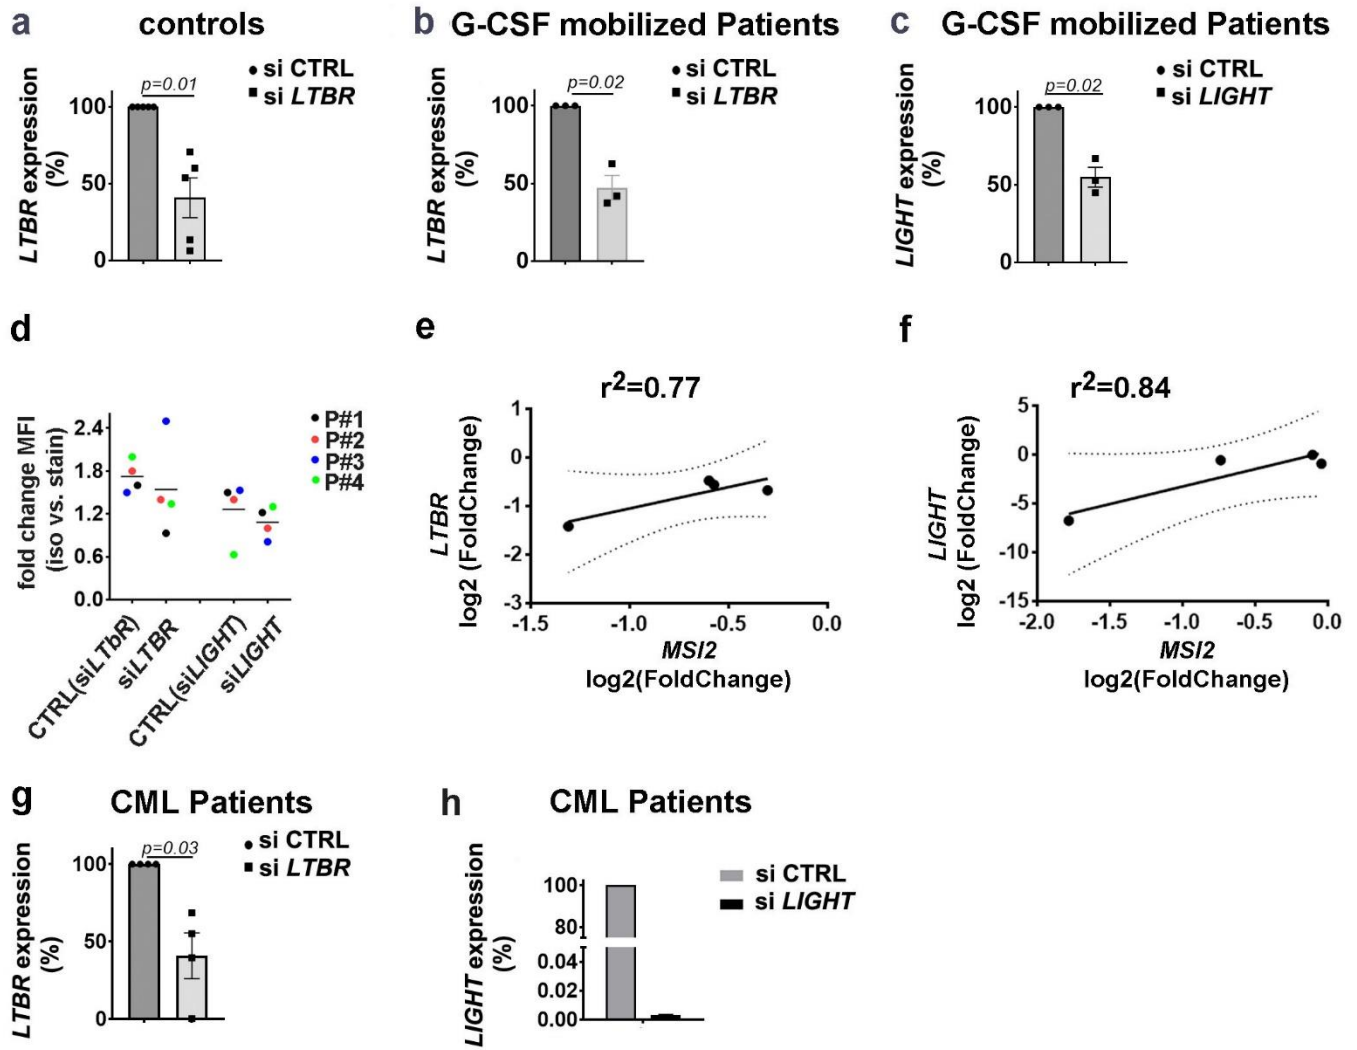



**Supplementary Figure 8: LT $\beta$ R and LIGHT siRNA knockdown efficiency.**

**(a)** Relative mRNA expression of *LTBR* in si*LTBR* or siCTRL transfected HSPCs (CD45<sup>int</sup>Lin<sup>-</sup>CD34<sup>+</sup>) from BM aspirates of untreated staging negative lymphoma patients (n=5). **(b)** Relative mRNA expression of *LTBR* in si*LTBR* or siCTRL transfected G-CSF mobilized PB HSPCs (n=3). **(c)** Relative mRNA expression of membranous *LIGHT* in si*LIGHT* or siCTRL transfected G-CSF mobilized PB HSPCs (n=3). **(d)** Fold change of surface LT $\beta$ R or LIGHT protein in si*LTBR* or si*LIGHT* treated cells relative to siCTRL after colony formation. Bulk cells were FACS analyzed 14 days post-plating with human anti-LT $\beta$ R and anti-LIGHT antibodies relative to isotype control. **(e)** Correlation analysis of *LTBR* (y-axis) and *MSI2* (x-axis) fold-change in gene expression from si*LTBR* and siCTRL transfected HSPCs. **(f)** Correlation analysis of *LIGHT* (y-axis) and *MSI2* (x-axis) fold-change in gene expression from si*LTBR* and siCTRL transfected HSPCs. **(g)** Relative mRNA expression of *LTBR* in si*LTBR* or siCTRL transfected HSPCs from CML patients (n=4 biological independent samples from n=5 CML patients). **(h)** Relative mRNA expression of membranous *LIGHT* in si*LIGHT* or siCTRL transfected HSPCs from CML patients (n=2). Data are presented as mean $\pm$ SEM. Statistics: two-tailed *t*-test.

## Supplementary Tables

Supplementary Table 1: Characteristics of G-CSF treated patients

| Patient number       | Diagnosis                                | Sex (f/m) | Age (yrs) |
|----------------------|------------------------------------------|-----------|-----------|
| Patient 1 with G-CSF | Ewing sarcoma                            | m         | 19        |
| Patient 2 with G-CSF | metastatic teratocarcinoma of the testis | m         | 47        |
| Patient 3 with G-CSF | Diffuse Large B-cell lymphoma            | m         | 29        |
| Patient 4 with G-CSF | primitive neuroectodermal tumor          | f         | 58        |
| Patient 5 with G-CSF | Medulloblastoma                          | f         | 12        |

Supplementary Table 2: Characteristics of lymphoma patients

| Patient number | Diagnosis                     | Sex (f/m) | Age (yrs) |
|----------------|-------------------------------|-----------|-----------|
| Patient 1      | Hodgkin-Lymphoma              | m         | 32        |
| Patient 2      | Diffuse Large B-cell lymphoma | f         | 59        |
| Patient 3      | Diffuse Large B-cell lymphoma | m         | 61        |
| Patient 4      | Burkitt-Lymphoma              | m         | 53        |
| Patient 5      | Non-Hodgkin-Lymphoma          | m         | 80        |

Supplementary Table 3: Characteristics of CML patients

| Patient number | Diagnosis | Sex (m/f) | Age (yrs) | Blood leukocytes [G/L] | Type of BCR-ABL1 transcript | Blasts [%] | BCR-ABL1/ABL1 in % IS (International Scale) |
|----------------|-----------|-----------|-----------|------------------------|-----------------------------|------------|---------------------------------------------|
| 1              | CML in CP | m         | 72        | 174.3                  | b2a2                        | <5         | 40.9                                        |
| 2              | CML in CP | m         | 65        | 179.7                  | b2a2                        | <5         | 31.6                                        |
| 3              | CML in CP | m         | 21        | 217.1                  | b2a2                        | <5         | 28.14                                       |
| 4              | CML in CP | m         | 76        | 43.3                   | b3a2                        | <5         | 34.3                                        |
| 5              | CML in CP | m         | 28        | 166                    | b2a2                        | <5         | 35.7                                        |

## Supplementary Table 4: Primer sequence of selected genes for fluidigm gene array

\*selected as reference gene

| Gene name                | Forward primer (5'→3')   | Len | Tm    | Reverse primer (5'→3')   | Len | Tm    | Amp (bp) |
|--------------------------|--------------------------|-----|-------|--------------------------|-----|-------|----------|
| <i>Actb</i> *            | AGATGACCCAGATCATGTTTGAG  | 23  | 60.64 | GTACGACCAGAGGCATACAG     | 20  | 60.09 | 90       |
| <i>Akt1</i>              | CCATGAACGAGTTTGAGTACC    | 21  | 59.13 | CAACCTCATCCTTGCGCA       | 18  | 59.79 | 140      |
| <i>Akt2</i>              | CCGCTATTATGCCATGAAGATCC  | 23  | 61.75 | TTGAGGGCTGTAAGGAAGGG     | 20  | 61.71 | 122      |
| <i>Ap2a2</i>             | AACCTGCAGACTAAGCCC       | 18  | 59.38 | GTCCCACCATACCTGAAGTCC    | 20  | 60.23 | 130      |
| <i>Bach1</i>             | TGTATCCATGACATCCGCAG     | 20  | 60.09 | ACTTTGCAGCTTCTCGATTTC    | 22  | 61.96 | 113      |
| <i>Bach2</i>             | GAGTTCATCCACGACATCC      | 19  | 58.09 | TCTCGCACACCAGTTTCC       | 18  | 60.03 | 120      |
| <i>Bak1</i>              | CCAACAGCATCTTGGGTC       | 18  | 58.44 | GAAGAGTTCGTAGGCATTCC     | 20  | 58.53 | 133      |
| <i>Bcl2</i>              | CGCAGAGATGTCCAGTCAG      | 19  | 60.32 | AAGAAGGCCACAATCCTCC      | 19  | 59.78 | 116      |
| <i>Bcl2l1 (Bcl-x)</i>    | TTCGGGATGGAGTAACTGG      | 20  | 59.58 | GGTGGTCATTAGATAGGTGG     | 21  | 60.36 | 140      |
| <i>Birc3</i>             | AACTCTCAAGAAATCCAGCC     | 21  | 60.5  | TATCGCCTTACCTAAAGCA      | 20  | 59.28 | 126      |
| <i>Birc5</i>             | CTTCATCCACTGCCCTACC      | 19  | 59.94 | TATGCTCCTCTATCGGGTTGTC   | 22  | 61.59 | 106      |
| <i>Bmi1</i>              | CAATGGCTCCAATGAAGACC     | 20  | 59.37 | TACTTTCCGATCCAATCTGCTC   | 22  | 60.4  | 120      |
| <i>Casp3</i>             | TGGACTCTGGGATCTATCTGG    | 21  | 60.36 | GAGATGACATTCCAGTGCTC     | 20  | 58.52 | 110      |
| <i>Casp8</i>             | TGATAAAGAGGCTCTGAGTAAGAC | 24  | 59.88 | AGTCTTTGTTCTGTGGTCTG     | 21  | 58.56 | 130      |
| <i>Casp9</i>             | GCAGATATGGCATAACCC       | 19  | 58.21 | GTGCTCAAGTTTGTACGG       | 19  | 59.81 | 131      |
| <i>Ccnb1 (cyclin B1)</i> | GTGAAGTGACTGGAAACATGAG   | 22  | 59.68 | ACAACTGTTCTGCATGAACC     | 20  | 59.15 | 130      |
| <i>Ccnd1 (cyclin D1)</i> | GAGCCCTGAAGAAGAGCC       | 19  | 60.55 | GTTCCATTTGCAGCAGCTC      | 19  | 60.25 | 150      |
| <i>Ccng1 (cyclin G1)</i> | GCCATTTGAGAGGAGAAACGA    | 21  | 60.83 | GCAAGGATAGATAGCGCCA      | 19  | 59.79 | 119      |
| <i>Ccng2 (cyclin G2)</i> | CGACACGATGAAGGATTTGG     | 20  | 59.46 | GCCTCCATCAAGATCAGCC      | 19  | 60.7  | 134      |
| <i>Cd99</i>              | CGAGTGACGACTTCAACCTG     | 20  | 61.13 | GCCTGAGTCTCCGTGTG        | 17  | 59.79 | 148      |
| <i>Cdk4</i>              | AATGTTGTACGGCTGATGG      | 19  | 58.29 | GTGCTTTGTCCAGGTATGTC     | 20  | 59.02 | 114      |
| <i>Cdk6</i>              | GAGTGCAGACCAGTGAGGA      | 19  | 61.39 | ACACATCAAACAACCTGACCA    | 21  | 60.57 | 110      |
| <i>Cdkn1a (P21)</i>      | CCAGCCTGACAGATTCTATCAC   | 23  | 61.26 | ACACAGAGTGAGGGCTAAGG     | 20  | 61.4  | 143      |
| <i>Cdkn1b (P27)</i>      | AATTGGGTCTCAGGCAAATC     | 21  | 61.05 | AAGAAGAATCTTCTGCAGCAGG   | 22  | 61.13 | 130      |
| <i>Cdkn1c (P57)</i>      | CCAATCAGCCAGCAGAACAG     | 20  | 61.8  | AGCTCCTCGTGGTCTACAG      | 19  | 60.85 | 113      |
| <i>Cdkn2a (P16)</i>      | GTGCTCTTTGTGTTCCGCT      | 19  | 61.36 | GCTCTGCTCTGGGATTGG       | 19  | 60.92 | 126      |
| <i>Cebpa</i>             | TCTGATTCTTGCCAAACTGAG    | 21  | 58.7  | GCTAAGACCCACTACTACATACAC | 24  | 60.48 | 184      |
| <i>Cebpb</i>             | AAGATGCGCAACCTGGAG       | 18  | 60.5  | GCTTGAACAAGTCCGCA        | 18  | 59.01 | 120      |
| <i>Cebpe</i>             | GTACCAAGTGGCACACTGC      | 19  | 61.73 | TGCCTTCTTGCCCTTGTC       | 18  | 60.66 | 171      |
| <i>Cttnb1</i>            | GCAAGTAGCTGATATTGACGG    | 21  | 59.34 | CAAAGTCTGCTGATGGGA       | 18  | 60.42 | 112      |
| <i>Cxcr4</i>             | CTGTAGAGCGAGTGTGCC       | 19  | 60.91 | GCAGGGTTCCTTGTGGAG       | 19  | 61.08 | 108      |
| <i>Diablo (Smac)</i>     | GGTTCCTATTGCTCAGAAATCGG  | 23  | 61.81 | GTGGTTTGAGACAGAAAGGTAGAG | 24  | 61.32 | 110      |
| <i>Dnmt1</i>             | AGATTGAGACCACTGTTCTCC    | 22  | 61.94 | CTTGGCTTCGTCGTAACCTC     | 21  | 61.21 | 115      |
| <i>Dnmt3a</i>            | ACACAGAAGCATATCCAGGAG    | 21  | 59.73 | CCAGTACCCTCATAAAGTCCC    | 21  | 59.73 | 112      |
| <i>Dnmt3b</i>            | GAAGAATTTGAGCCACCCA      | 19  | 58.1  | TCCTTGAGCACCAAGTACC      | 19  | 59.41 | 112      |
| <i>E2f1</i>              | CAGGGAAAGGTGTGAAATCTC    | 21  | 59.05 | CCCAGTTCAGGTCAACGA       | 18  | 59.31 | 122      |

|                        |                          |    |       |                           |    |       |     |
|------------------------|--------------------------|----|-------|---------------------------|----|-------|-----|
| <i>Eif2ak2</i>         | GCCTATCAGAAGCTGTAAAGAG   | 23 | 59.38 | ACTGGGAAACACCATTACTTGTC   | 23 | 61.27 | 120 |
| <i>Fgfr2</i>           | ATCTGCCTGGTCTTGTC        | 18 | 59.05 | TTTGGTTGGTGGCTCTTCTG      | 20 | 60.96 | 101 |
| <i>Foxp1</i>           | AGTGCCTCATAATCTTAGTCTCCA | 24 | 61.71 | TTAATAAGGGGAAGGGTTACCACTG | 24 | 60.31 | 134 |
| <i>Fzd3</i>            | ACGTGTCACACTTCCTG        | 18 | 59.63 | CATCACAATCTGGAAACCTACTG   | 23 | 59.56 | 124 |
| <i>Fzd7</i>            | GTTGACCTTTACCCTACCTTTGAC | 24 | 61.57 | ATATGAAGTAATCTGCTCTCCGA   | 24 | 60.99 | 121 |
| <i>Gapdh*</i>          | AGAACATCATCCCTGCATCC     | 20 | 60.01 | TCATCATACTGGCAGGTTTCTC    | 23 | 60.89 | 159 |
| <i>Gata1</i>           | TGAACTGTGGAGCAACGG       | 18 | 60.34 | CTGACAATCATTGCTTCTTGG     | 22 | 60.4  | 138 |
| <i>Gata2</i>           | CAGCAGTCTTCCATCCAG       | 20 | 60.3  | GGCACCACAGTTGACAC         | 17 | 58.55 | 117 |
| <i>Gfi1</i>            | CCTTCAGCTCCCGAATTCC      | 20 | 61.23 | GATACTCTGAGTCTCGTGCTG     | 22 | 60.72 | 117 |
| <i>Gli1</i>            | CTGAGACGCCATGTTCAATCC    | 21 | 61.83 | ACCAGAAAGTCCTTCTGTCC      | 21 | 60.08 | 120 |
| <i>Gsk3b</i>           | AAGTTCTACAGGACAAGCGA     | 20 | 59.14 | ACCTCATCTTCTTCTCACCAC     | 22 | 60.2  | 120 |
| <i>Hdac1</i>           | CATCTTAAGCCAGTCATGTCC    | 22 | 59.55 | GCGTGTCTTTGATGGTC         | 18 | 58.86 | 128 |
| <i>Hes1</i>            | GTCATCAAAGCCTATCATGGAG   | 22 | 59.09 | CGGGAGCTATCTTCTTAAGTG     | 22 | 58.77 | 104 |
| <i>HoxB4</i>           | AAAGAGCCCCTGCTTACC       | 19 | 61.82 | CGATTGTAGTAAACTCCTTCTCC   | 24 | 61.44 | 145 |
| <i>Il1r1</i>           | CCCTGATTATTTGATGTAICTGAC | 24 | 59.52 | AGAGCTTTGCAGTCTTAAACC     | 22 | 59.61 | 122 |
| <i>Il4</i>             | CAGCAACGAAGAACCAC        | 19 | 59.81 | GCAGCTCCATGAGAACAC        | 18 | 58.54 | 125 |
| <i>Il7</i>             | TGATCAGCATCGATGAATTGGAC  | 23 | 61.57 | AAGCAGCTTCTTTGTATCATCAC   | 24 | 61.93 | 110 |
| <i>Il33</i>            | GGCAAAGTTCAGCAGCAC       | 18 | 60.11 | CAGAACGGAGTCTCATGCAG      | 20 | 60.93 | 112 |
| <i>Igf1r</i>           | CTTCCTGTGAAAGTGATGTTCTC  | 23 | 59.76 | GTGCCTCCTGTAGTAAACTG      | 21 | 58.78 | 134 |
| <i>Irf8</i>            | GTATGACCAAGAGGAGCCC      | 19 | 59.64 | ATCTGGGAGAAAGCTGAATGG     | 21 | 60.29 | 144 |
| <i>Jag1</i>            | CTTGCCATTCCTGACAG        | 19 | 61.51 | GTTGTTCTTCCCAGCCAC        | 19 | 61.38 | 114 |
| <i>Jag2</i>            | ATTGATGAGTGCCAGTCTT      | 19 | 58.77 | CGTGAATATGACCACTTCTG      | 21 | 58.93 | 125 |
| <i>Jun</i>             | CCAAGAACTCGGACCTTCTC     | 20 | 60.23 | GTGATGTGCCATTGCTG         | 18 | 59.56 | 102 |
| <i>Kif3a</i>           | CAGAGGTTAGAGGTTAAAGAAAGG | 24 | 59.03 | GCTCGTTCATATTAGTCGCAC     | 21 | 59.69 | 147 |
| <i>Kit</i>             | GTGTTTGTAGAGATCTGCCA     | 22 | 60.8  | TCGATGAGGGGAATAATTGGACAC  | 23 | 60.7  | 124 |
| <i>Klf1</i>            | GACTTCTCAAGTGGTGGC       | 19 | 60.77 | GTCCCTCTCATCGTCTCTC       | 20 | 61.31 | 128 |
| <i>Lef1</i>            | ACCCTCTACTCCAGTACTC      | 21 | 60.22 | GGGCACCTTATTTGATGCTCTC    | 22 | 59.81 | 114 |
| <i>Lta</i>             | CTTCTGCCTTCGACTG         | 18 | 58.15 | TGTGGAGAACTGCTGTG         | 18 | 59.62 | 162 |
| <i>Ltb</i>             | GATGACCATCCTGTCTCCA      | 19 | 58.55 | CATCCAAGCGCCTATGAG        | 18 | 58.07 | 126 |
| <i>LTBR</i>            | CCCATACCAGATGTGAGATCC    | 21 | 59.87 | GGTGAAGAGCAGAAAGAGGAC     | 21 | 60.83 | 145 |
| <i>Maml1</i>           | ATACCTCAGCAGCCAGCA       | 18 | 61.16 | TTGTTTCTCTGCTCAGCC        | 19 | 60.4  | 147 |
| <i>Msi2</i>            | CGCTATGGAGCAAATGGG       | 19 | 61.37 | TAAGGCTATCTGGTGAAGTCTG    | 22 | 61.21 | 115 |
| <i>Myc</i>             | CAGTGGTCTTCCCTACCC       | 19 | 59.48 | TCTTGCTCTTCTCAGAGTCG      | 21 | 59.94 | 192 |
| <i>Nfkb1</i>           | CTGAGAAGGAAACTGAAGGTG    | 21 | 58.71 | GAAAGAGGTTATCCTGAAATCCC   | 23 | 59.05 | 125 |
| <i>Nfkb2</i>           | CATCCATGACAGCAAGTCTCC    | 21 | 61.24 | ATCATCTCATAGAACCGAACC     | 22 | 59.87 | 150 |
| <i>Notch1</i>          | CAGACCAACACGCAGTACC      | 19 | 61.13 | CGTCAATGCCTCGCTTCTG       | 19 | 61.92 | 108 |
| <i>Notch2</i>          | CGCATTAAACAAGATTCTCAGGG  | 23 | 60.44 | AATATCTTAGAGCCTATCACCTCC  | 24 | 59.25 | 145 |
| <i>Numb</i>            | GAGAAAGAAAGACGTTTATGTCCC | 24 | 60.12 | GTGGCCGAGGTAAGTAACTG      | 20 | 60.59 | 111 |
| <i>Pafah1b1 (Lis1)</i> | GATGCTACAATTAAGGTGTGGGA  | 23 | 60.89 | TAATCGTCATATCTGCTGAACAGG  | 24 | 60.78 | 138 |
| <i>Pik3ca</i>          | GAGAGTTTGTAGAGGTTTTCAGG  | 21 | 58.43 | AAGATTGTAGTTCTGGCATTCC    | 22 | 58.88 | 122 |
| <i>Ptch1</i>           | TGTTCCAGTTAATGACTCCA     | 21 | 59.16 | ACTTTGATGAACCACCTCCAC     | 21 | 60.7  | 142 |
| <i>Rela</i>            | TCGAATCTCCCTGGTCAC       | 18 | 58.42 | GTTCTGGAAGCTATGGATACTG    | 22 | 58.5  | 129 |

|                         |                          |    |       |                          |    |       |     |
|-------------------------|--------------------------|----|-------|--------------------------|----|-------|-----|
| <i>Relb</i>             | CGACAAGAAGTCCACCAACAC    | 21 | 61.9  | TGTGCTGAACACCACGG        | 17 | 60.28 | 138 |
| <i>Runx1</i>            | GAGGTACTAGCTGACCACCC     | 20 | 61.53 | TGCCACCACCTTGAAAGC       | 18 | 60.98 | 122 |
| <i>Satb1</i>            | TGATCTCCTCCATTGTGAACAG   | 22 | 60.27 | CTATCCATCTCAACCATCATATCC | 24 | 58.59 | 120 |
| <i>Sirt1</i>            | GCACTAATTCCAAGTTCTATACCC | 24 | 59.46 | ACCACCTAGCCTATGACAC      | 19 | 58.55 | 140 |
| <i>Smo</i>              | CACCTCCTCAAAGCCCTG       | 19 | 60.78 | AGTCTCCATCTACCTGAGCC     | 20 | 60.6  | 133 |
| <i>Spi1 (PU.1)</i>      | CCATAGCGATCACTACTGGG     | 20 | 59.87 | CATGTGGCGATAGAGCTG       | 18 | 58.08 | 132 |
| <i>Tet2</i>             | AGAACACTCATGGAAGAAAGG    | 21 | 58.06 | CCGATATACCCATTTAGCAATAGG | 24 | 59.15 | 122 |
| <i>Tnfrsf14 (LIGHT)</i> | GAGACATAGTAGCTCATCTGCC   | 22 | 60.27 | CGTTGGCTCCTGTAAGATGTG    | 21 | 61.5  | 110 |
| <i>Tnfrsf14</i>         | TGATTTCAAGAGTGACTTGTGG   | 22 | 59.02 | ACTTCTTAGACTTGAGCCGAG    | 21 | 59.67 | 142 |
| <i>Traf2</i>            | AGAGTAGTTCGGCCTTTCCA     | 20 | 61.04 | TCTCGTATTCTTTCAAGGTCCC   | 22 | 60.01 | 110 |
| <i>Traf3</i>            | CGGCACAGAATTTCAAGTTCC    | 21 | 60.55 | TTGTAGCCTCCTTGCTCC       | 18 | 59.05 | 140 |
| <i>Trp53</i>            | ATGTGCACGTAATCTCTCTC     | 19 | 59.27 | TGCTGTGACTTCTTGTAGATGG   | 22 | 60.53 | 136 |
| <i>Wisp2</i>            | TGTGCCTCTTCGAAGAGGA      | 19 | 60.71 | GTGAAACCACCGTCATCAC      | 19 | 59.21 | 117 |

## References

1. Untergasser A, Nijveen H, Rao X, Bisseling T, Geurts R, Leunissen JA. Primer3Plus, an enhanced web interface to Primer3. *Nucleic Acids Res* **35**, W71-74 (2007).
2. Livak KJ, Schmittgen TD. Analysis of relative gene expression data using real-time quantitative PCR and the 2(-Delta Delta C(T)) Method. *Methods* **25**, 402-408 (2001).
