# Supplementary material for: LIGHT/LTβR signaling regulates self-renewal and differentiation of hematopoietic and leukemia stem cells
Source: PubMed Central journal article supplement (PMC7887212; doi:10.1038/s41467-021-21317-x), 2021-02-16
Supplement: 41467_2021_21317_MOESM3_ESM.pdf [file 41467_2021_21317_MOESM3_ESM.pdf]

## **Description of Additional Supplementary Files**

### **Supplementary Data 1:**

Differentially expressed genes in LTbR- deficient HSCs relative to LTbR proficient HSCs  
FACS-purified *Ltbr*<sup>-/-</sup> and Ly5.1 LT/ST-HSCS from chimeras six weeks after primary transplantation (n=6, pooled to 3 biological replicates) were used for RNA-seq analysis. Supplementary data 1 includes all 227 differentially expressed genes.
